# Supplementary material for: ARHGAP18-ezrin functions as an autoregulatory module for RhoA in the assembly of distinct actin-based structures
Source: eLife. 2024 Jan 9;13:e83526. doi: 10.7554/eLife.83526 (PMC10830128; doi:10.7554/eLife.83526)
Supplement: Supplementary file 1. [file elife-83526-supp1.xlsx]

## Sheet: Supplementary File 1a
Supplementary File 1a- Plasmids Used- Lombardo et al. 2023
Plasmid/ Protein Product Name	ATLombardo Database ID	Backbone	Insert	Source	Use
ARHGAP18 (untagged)	4750	PE-SUMO	Human ARHGAP18	This Study	Expression for Protein Purification
ARHGAP18-pLentiCrispr-V2-2	4740	pLentiCRISPR-V2	guide:CTAACAGCCTACCACCCCAG	This Study	Lenti CRISPR KO of ARHGAP18
EGFP-ARHGAP18	4710	pCDNA3	EGFP-ARHGAP18	Lovelace et al. Molecular biology of the cell 28.8 (2017): 1066-1078.	Validation
ARHGAP18-Flag	3160	pQCXIP	h+A6:D7uman ARHGAP18. C-term linker to 3xflag	This Study	Immunofluorescence
ARHGAP18-R365A-Flag	4803	pQCXIP	ARHGAP18 with R365A mutatation. C-term linker to 3X-flag	This Study	Immunofluorescence
GAP-Flag	4804	pQCXIP	Truncated ARHGAP18 leaving structural GAP domain fragment 319-523. C-term linker to 3X-flag	This Study	Immunofluorescence
GAP-Flag-EBP50(tail)	4805	pQCXIP	ARHGAP18(319-523)-3xflag-EBP50tail(308-358). Same EBP50 fragment used in Garbett & Bretscher, 2012 cloned onto the end of GAP-Flag.	This Study	Immunofluorescence
ARHGAP18(Δ10-17)-Flag	4806	pQCXIP	WT Full length ARHGAP18 with AA10-17 deleted. C-term linker then 3X-flag	This Study	Immunofluorescence
Ezrin (untagged)	576	pQE15	Human Ezrin	Chamberset al. Biochemistry 44.10 (2005): 3926-3932.	Expression for Protein Purification
FERM (untagged)	572	pQE16	Ezrin 1-298	Reczek et al. The Journal of cell biology 139.1 (1997): 169-179.	Expression for Protein Purification
Ezrin-iFlag	2095	pQCXIP	Ezrin with flag tagged interally at AA 479 within the flexible linker	Viswanatha et al. Journal of Cell Biology 199.6 (2012): 969-984.	Immunofluorescence; pulldowns
Ezrin 1-479 Flag	3286	pQCXIP	Trauncated Ezrin with AA from 1-479 (ends at location of the flag in ezrin 'iflag' constructs. C-term linker then 3x Flag	Viswanatha et al. Journal of Cell Biology 199.6 (2012): 969-984.	Immunofluorescence; pulldowns
Ezrin 1-583 Flag	3112	pQCXIP	Trauncated Ezrin with AA from 1-583. internal linker then 3x Flag at AA 479	Viswanatha et al. Journal of Cell Biology 199.6 (2012): 969-984.	Immunofluorescence; pulldowns
Ezrin T567E iFlag	3111	pQCXIP	Ezrin with T567A mutation . Internal linker then 3x Flag at AA 479	Viswanatha et al. Journal of Cell Biology 199.6 (2012): 969-984.	Immunofluorescence; pulldowns
Ezrin T567A iFlag	2132	pQCXIP	Ezrin with T567E mutation . Internal linker then 3x Flag at AA 479	Viswanatha et al. Journal of Cell Biology 199.6 (2012): 969-984.	Immunofluorescence; pulldowns
pEGFP-RhoA (AHPH) Biosensor	4574	pEGFP-C1	C-terminus of Anillin (RhoA-GTP sensor)	Piekny et al. Current Biology 18(1) (2008): 30-6.
GFP-AHPH-DM	4575	pEGFP-C1	RhoA-GTP negative control	Priya et al. Nature Cell Biology (2015) :1282-93.

## Sheet: Supplementary File 1b
Supplementary File 1b- DNA Oligonucleotides Used- Lombardo et al. 2023
Alombardo ID	Primer Name	Sequence	Use
ATL73	Ezrin-1-298-Fwd	GACTACAAAGACGATGACGACAAGTAAGAATTC	Ezrin FERM sequencing and cloning
ATL74	Ezrin-1-298-rev	GTCAGGCTTCCTGCGGCG	Ezrin FERM sequencing and cloning
ATL75	Gibs-ARHGAP18R365A3xflagPQCXIP-F	ACGCTTAATTAACGGATCCGGAATTATGAGCTGGCTCTCCAGTTCCCAGG	GAP Dead ARHGAP18 Gibson cloining
ATL76	Gibs-ARHGAP18R365A3xflagPQCXIP-R	GAAGACAGGGCCAGGTTTCCGGGCCttActtgtcatcgtcatccttgtaatcgatgt	GAP Dead ARHGAP18 Gibson cloining
ATL77	Gib ARHGAP18 319-523 3xflag F1	ACGCTTAATTAACGGATCCGGAATTATGTCTGGTCTTTTTTGCGTTCCATTGACAG	GAP domain only Gibson cloning
ATL78	Gib ARHGAP18 319-523 3xflag R1	CCACTTTGTACAAGAAAGTTGGcaaCCACAGAAGTTTTTGGTACTTAATCAATAAGTGCA	GAP domain only Gibson cloning
ATL79	Gib ARHGAP18 319-523 3xflag F2	GATTAAGTACCAAAAACTTCTGTGGttgCCAACTTTCTTGTACAAAGTGGTTCG	GAP domain only Gibson cloning
ATL80	Gib ARHGAP18 319-523 3xflag R2	GAAGACAGGGCCAGGTTTCCGGGCCtTActtgtcatcgtcatccttgtaatcgatgt	GAP domain only Gibson cloning
ATL81	Gib F1 ARHGAP18 319-523 3xflag EBP50 308-358	ACGCTTAATTAACGGATCCGGAATTATGTCTGGTCTTTTTTGCGTTCCATTGACAG	GAP domain-EBP50 tail Gibson Cloning
ATL82	Gib R1 ARHGAP18 319-523 3xflag EBP50 308-358	CCACTTTGTACAAGAAAGTTGGcaaCCACAGAAGTTTTTGGTACTTAATCAATAAGTGCA	GAP domain-EBP50 tail Gibson Cloning
ATL83	Gib F2 ARHGAP18 319-523 3xflag EBP50 308-358	GATTAAGTACCAAAAACTTCTGTGGttgCCAACTTTCTTGTACAAAGTGGTTCG	GAP domain-EBP50 tail Gibson Cloning
ATL84	Gib R2 ARHGAP18 319-523 3xflag EBP50 308-358	AGGAGGTAGACGAGGGCGCTGTGGActtgtcatcgtcatccttgtaatcgatgt	GAP domain-EBP50 tail Gibson Cloning
ATL85	Gib F3 ARHGAP18 319-523 3xflag EBP50 308-358	cgattacaaggatgacgatgacaagTCCACAGCGCCCTCGTCTACCTCCT	GAP domain-EBP50 tail Gibson Cloning
ATL86	Gib R3 ARHGAP18 319-523 3xflag EBP50 308-358	GAAGACAGGGCCAGGTTTCCGGGCCTCAGAGGTTGCTGAAGAGTTCGTTTTT	GAP domain-EBP50 tail Gibson Cloning
ATL31	pLentiCRISPRv2-ARHGAP18-1 FWD	CACCGCTAACAGCCTACCACCCCAG	ARHGAP18 CRISPR Guide #1
ATL32	pLentiCRISPRv2-ARHGAP18-1 REV	aaacCTGGGGTGGTAGGCTGTTAGC	ARHGAP18 CRISPR Guide #1
ATL33	pLentiCRISPRv2-ARHGAP18-2 FWD	CACCGCGGTCTGGTCCTTGCCGCTG	ARHGAP18 CRISPR Guide #2
ATL34	pLentiCRISPRv2-ARHGAP18-2 REV	aaacCAGCGGCAAGGACCAGACCGC	ARHGAP18 CRISPR Guide #2
ATL35	ARHGAP18-Sumo AarI-FWD	atCACCTGCATATAGGTagctggctctccagttcc	Cloning for purified ARHGAP18 using SUMO
ATL36	ARHGAP18-Sumo XbaI-REV	ATtctagaCTACAATGGCTTTGACTTTAT	Cloning for purified ARHGAP18 using SUMO
ATL37	SUMO_313_FWD_1	CAGGGTAAGGAAATGGACTCC	Sequencing check of SUMO ARHGAP18
ATL38	ARHGAP18_848_Fwd_2	TATCAACATTGACGCGGACC	Sequencing check of ARHGAP18
ATL39	ARHGAP18_1311_FWD_3	CCTAATTGAGCTGACTGCCC	Sequencing check of ARHGAP18
ATL40	ARHGAP18_1813_Fwd-4	CACACTGAAGGCCCTTCTTG	Sequencing check of ARHGAP18
ATL41	ARHGAP18_2331_Fwd-5	AAATATTGGGGAACGCTGCC	Sequencing check of ARHGAP18
ATL94	ARHGAP18-(Δ10-17)-Flag FWD	TAATTAACGGATCCGGAATTATGAGCTGGCTCTCCAGTTCCCAGGGAGGCAAGGACCAGGCCGTCGG	ARHGA18 10-17 Deletion cloning Primer Fwd
ATL95	ARHGAP18-(Δ10-17)-Flag REV	CCGACGGCCTGGTCCTTGCCTCCCTGGGAACTGGAGAGCCAGCTCATAATTCCGGATCCGTTAATTA	ARHGA18 10-17 Deletion cloning Primer REV

## Sheet: Supplementary File 1C
Figure	1E	1E	1E	1E	1E	1E	1E	1E	1E	1E	1E	1E	2D	2D	2D	2F	2F	2F	3B	3B	3F	3F	3F	3F	3F	4D	4D	4D	4D	4D	4D	4D	4D	4D	4D	4F	4F		4H		4H		4H		4H		4H		4H
Component	WT cells Empty-flag	WT cells ezrin flag (data from Fig 1E normalized to this lane)	WT cells Ezrin (1-479) flag	WT cells Ezrin (1-583) flag	WT Cells EzrinT567E flag	WT Cells EzrinT567A flag	LOK/SLK KO cells Empty-flag	LOK/SLK KO cells ezrin flag	LOK/SLK KO cells Ezrin (1-479) flag	LOK/SLK KO cells Ezrin (1-583) flag	LOK/SLK KO Cells EzrinT567E flag	LOK/SLK KO Cells EzrinT567A flag	WT Jeg3	ARHGAP18-/-	WT Jeg3 +ARHGAP18	WT Jeg3	ARHGAP18-/-	WT Jeg3 +ARHGAP18-flag	WT Jeg3	ARHGAP18-/-	+ARHGAP18-flag (repeated from 2F for comparison between conditions)	+Empty-flag	+GAP-flag	+ARHGAP18(R365A)-flag	+GAP-flag-EBP50(tail)	Null/ Buffer only (normalized to this condition)	RhoA	ARHGAP18	FERM	p50RhoAGAP	ARHGAP18 + FERM	ARHGAP18 + RhoA	RhoA	RhoA + ARHGAP18 + FERM	RhoA + p50RhoAGAP	WT Jeg3	ARHGAP18 -/-	WT-1X	WT-1Y	WT-2X	WT-2Y	WT-3X	WT-3Y	WT-4X	WT-4Y	WT-5X	WT-5Y	ARHGAP18-1X	ARHGAP18-1Y
Mean	0.04124	1	9.539	5.77	1.719	0.4246	0.002955	0.01518	6.412	3.243	0.5183	0.034	1.194	1.533	0.6789	0.2676	0.5466	0.2249	9.794	5.636	0.2249	0.5566	0.08667	0.6077	0.1203	0	0.04213	0.008037	0.02522	0.05028	0.07522	0.1969	0.08306	0.3367	0.3683	0.8795	1.438	N/A for line scan intensity data
Standard Error of Mean	0.0325483	0	4.05554	1.89234	0.416571	0.0907252	0.000445714	0.00868542	2.82256	1.03713	0.298706	0.0169702	0.02958	0.08965	0.05862	0.01488	0.03427	0.01876	0.3112	0.3456	0.01876	0.1518	0.01296	0.07654	0.01135	0	0.03254	0.0152	0.03094	0.04567	0.0413	0.0274	0.0233	0.04361	0.02097	0.1304	0.06897	N/A for line scan intensity data
n	4	4	4	4	4	4	4	4	4	4	4	4	3	3	3	38	51	21	63	88	21	5	3	3	4	4	4	4	4	4	4	4	4	4	4	4	4	N/A for line scan intensity data
Data values	0.021897	1	11.4236	7.65118	1.02216	0.219827	0.003727	0.006815	13.9979	2.7465	0.226525	0.003727	1.24329	1.66737	0.689949	0.215971	0.189342	0.241108	11	1	0.241108	0.299094	0.075359	0.65358	0.09696	0	0.061383	0.0429	0.06035	0.0789167	0.09005	0.201217	0.08335	0.255317	0.394383	0.661604	1.43242	0	0.00666534	0	0.00680094	0	0	0	0.263427	0	0.0011038	0	0
	0.003327	1	1.1298	3.78624	1.5249	0.363757	0.003727	0.003727	0.469994	0.539249	0.044794	0.009152	1.19679	1.56947	0.572352	0.338465	0.269702	0.167952	11	4	0.167952	0.278706	0.112513	0.711208	0.120178	0	-0.04648	-0.00501667	-0.01218	-0.00528333	-0.0066	0.1455	0.12895	0.339383	0.386817	0.758016	1.30193	0.00217999	0.00747799	0.0021565	0.00762369	0.00266121	0.00698391	0.00194672	0.000818099	0.0024953	0.00157922	0.0036923	0.0124258
	0.001803	1	5.66583	1.60889	1.40108	0.651895	0.002183	0.041021	4.75414	4.50961	1.38496	0.075758	1.14097	1.36319	0.77451	0.474523	0.362408	0.225061	6	3	0.225061	0.491597	0.072137	0.458273	0.151041	0	0.044567	0.0210833	0.092867	0.165633	0.1839	0.2716	0.100833	0.295183	0.386433	1.25455	1.62809	0.00435596	0.00850104	0.00430902	0.00819967	0.0053175	0.0128224	0.00388985	0.00184801	0.004986	0.00127787	0.00737779	0.0288671
	0.137914	1	19.9362	10.0341	2.9265	0.463017	0.002183	0.009152	6.42576	5.17862	0.417016	0.047351				0.413249	0.270162	0.13189	11	5	0.13189	0.59924			0.112834	0	0.109033	-0.0268167	-0.04017	-0.03815	0.0335333	0.169217	0.0191	0.457	0.30565	0.84374	1.38908	0.00653595	0.00825475	0.00646553	0.0089103	0.00797871	0.015959	0.00583657	0.00160007	0.00748131	0.00164912	0.0110701	0.0440913
																0.265005	0.251855	0.387176	11	8	0.387176	1.11432																0.00871594	0.00917969	0.00862203	0.00953898	0.0106399	0.0199306	0.00778329	0.00253122	0.00997661	0.00179477	0.0147624	0.0580684
																0.328633	0.224671	0.326701	11	2	0.326701																	0.0108919	0.00952696	0.0107746	0.0100092	0.0132962	0.0223126	0.00972642	0.00288082	0.0124673	0.00138559	0.0184479	0.077183
																0.314418	0.28646	0.270861	3	10	0.270861																	0.0130719	0.0101948	0.0129311	0.0107671	0.0159574	0.0290648	0.0116731	0.00355316	0.0149626	0.00102444	0.0221402	0.0966568
																0.259659	0.281068	0.362121	6	4	0.362121																	0.0152519	0.0122397	0.0150876	0.0115759	0.0186186	0.0418689	0.0136199	0.00561171	0.0174579	0.00135269	0.0258325	0.111681
																0.255315	0.30997	0.216221	11	2	0.216221																	0.0174279	0.0145685	0.0172401	0.0124597	0.0212749	0.0530374	0.015563	0.00795616	0.0199486	0.00121021	0.029518	0.129109
																0.198761	0.282827	0.249454	11	11	0.249454																	0.0196078	0.0168463	0.0193966	0.0132225	0.0239361	0.0573924	0.0175097	0.0102493	0.0224439	0.00115123	0.0332103	0.135334
																0.26265	0.664911	0.142808	11	6	0.142808																	0.0217878	0.0197973	0.0215531	0.0149373	0.0265973	0.065622	0.0194564	0.0132201	0.0249392	0.00105242	0.0369026	0.145309
																0.4437	0.305243	0.256056	11	5	0.256056																	0.0239638	0.0227686	0.0237056	0.0168516	0.0292536	0.0764729	0.0213996	0.0162113	0.0274299	0.00145042	0.040588	0.153498
																0.507789	0.591534	0.13687	5	11	0.13687																	0.0261438	0.028364	0.0258621	0.0189644	0.0319148	0.100317	0.0233463	0.0218442	0.0299252	0.00124773	0.0442803	0.143915
																0.228154	0.345675	0.069139	11	1	0.069139																	0.0283238	0.0360962	0.0280186	0.0207452	0.034576	0.137629	0.025293	0.0296283	0.0324205	0.000980024	0.0479726	0.14894
																0.352984	0.456868	0.249921	11	6	0.249921																	0.0304997	0.0479249	0.0301711	0.0228879	0.0372323	0.196264	0.0272361	0.0415364	0.0349112	0.00155281	0.0516581	0.149257
																0.178783	0.377946	0.208081	11	3	0.208081																	0.0326797	0.0626379	0.0323276	0.0251434	0.0398936	0.268515	0.0291828	0.0563482	0.0374065	0.00156715	0.0553504	0.15913
																0.149737	0.836586	0.33554	11	10	0.33554																	0.0348597	0.0823048	0.0344841	0.0274337	0.0425548	0.370496	0.0311296	0.076147	0.0399018	0.00115343	0.0590427	0.187115
																0.121567	1.30725	0.276132	11	5	0.276132																	0.0370357	0.117251	0.0366367	0.030467	0.0452111	0.495409	0.0330727	0.111328	0.0423925	0.000875699	0.0627282	0.231269
																0.13878	0.854079	0.21317	11	4	0.21317																	0.0392157	0.178318	0.0387932	0.0360836	0.0478723	0.631003	0.0350194	0.172804	0.0448878	0.000481163	0.0664205	0.29231
																0.312298	0.715228	0.089154	10	2	0.089154																	0.0413957	0.27063	0.0409497	0.0426972	0.0505335	0.769084	0.0369661	0.265736	0.0473832	0.00032706	0.0701128	0.343265
																0.24799	1.11625	0.167379	6	10	0.167379																	0.0435716	0.395548	0.0431022	0.0493323	0.0531898	0.878412	0.0389093	0.391493	0.0498739	0.000566635	0.0737983	0.381913
																0.133958	0.322255		11	7																		0.0457516	0.537002	0.0452587	0.0582271	0.055851	0.959079	0.040856	0.533895	0.0523692	0.000429969	0.0774906	0.427815
																0.195665	0.586053		11	9																		0.0479316	0.686187	0.0474152	0.0782964	0.0585122	1	0.0428027	0.684082	0.0548645	0.00020485	0.0811829	0.466171
																0.192973	0.431019		11	5																		0.0501076	0.815086	0.0495677	0.113845	0.0611685	0.999115	0.0447458	0.813845	0.0573552	0	0.0848684	0.507791
																0.193703	0.492164		11	4																		0.0522876	0.907913	0.0517242	0.166805	0.0638297	0.975745	0.0466926	0.907295	0.0598505	0.000511753	0.0885607	0.53185
																0.204585	0.456645		11	4																		0.0544676	0.972177	0.0538807	0.226521	0.0664909	0.91591	0.0486393	0.97199	0.0623458	0.00194421	0.092253	0.552568
																0.240968	0.803512		11	3																		0.0566435	1	0.0560332	0.287092	0.0691472	0.826137	0.0505824	1	0.0648365	0.00376066	0.0959385	0.553834
																0.247858	0.593283		11	11																		0.0588235	0.985887	0.0581897	0.330727	0.0718084	0.719389	0.0525291	0.985792	0.0673318	0.00726763	0.0996308	0.546609
																0.244429	0.292432		11	1																		0.0610035	0.926257	0.0603462	0.409036	0.0744696	0.597132	0.0544758	0.925762	0.0698271	0.0104091	0.103323	0.552947
																0.275206	0.67409		9	9																		0.0631795	0.827164	0.0624988	0.514744	0.0771259	0.493662	0.056419	0.826004	0.0723178	0.0148887	0.107009	0.574954
																0.297765	1.22422		10	4																		0.0653595	0.70436	0.0646553	0.628646	0.0797871	0.400482	0.0583657	0.702376	0.0748131	0.0289795	0.110701	0.612276
																0.341792	0.525625		11	7																		0.0675395	0.566997	0.0668118	0.723677	0.0824483	0.333825	0.0603124	0.564091	0.0773084	0.061176	0.114393	0.639523
																0.300934	0.478717		11	9																		0.0697154	0.444523	0.0689643	0.792631	0.0851046	0.295761	0.0622555	0.440796	0.0797991	0.115371	0.118079	0.676615
																0.304785	0.456194		11	5																		0.0718954	0.352178	0.0711208	0.842542	0.0877658	0.261599	0.0642023	0.347831	0.0822944	0.184843	0.121771	0.725704
																0.3144	0.346514		11	10																		0.0740754	0.280058	0.0732773	0.893784	0.090427	0.227268	0.066149	0.275227	0.0847897	0.254151	0.125463	0.765486
																0.163205	0.54263		11	6																		0.0762514	0.22743	0.0754298	0.93654	0.0930833	0.204023	0.0680921	0.222246	0.0872804	0.309393	0.129149	0.80407
																0.195635	0.372152		11	8																		0.0784314	0.186954	0.0775863	0.973444	0.0957445	0.189253	0.0700388	0.181498	0.0897757	0.344079	0.132841	0.842152
																0.312823	0.640842		11	6																		0.0806114	0.159424	0.0797428	0.944662	0.0984057	0.181008	0.0719855	0.153784	0.092271	0.360073	0.136533	0.877506
																	0.509136		4	4																		0.0827873	0.13655	0.0818953	0.863713	0.101062	0.175341	0.0739287	0.130757	0.0947617	0.364712	0.140219	0.909088
																	0.743864		11	11																		0.0849673	0.117372	0.0840518	0.758315	0.103723	0.17763	0.0758754	0.111449	0.097257	0.356557	0.143911	0.91413
																	0.680084		11	2																		0.0871473	0.101008	0.0862083	0.653843	0.106384	0.179453	0.0778221	0.0949753	0.0997523	0.328481	0.147603	0.92635
																	0.644397		11	9																		0.0893233	0.0875906	0.0883609	0.556227	0.109041	0.17117	0.0797652	0.0814682	0.102243	0.277848	0.151289	0.930908
																	0.702101		11	7																		0.0915033	0.0759387	0.0905174	0.456769	0.111702	0.169065	0.081712	0.0697382	0.104738	0.211461	0.154981	0.935961
																	0.582484		11	3																		0.0936833	0.0644661	0.0926739	0.3478	0.114363	0.174688	0.0836587	0.0581887	0.107234	0.145129	0.158673	0.924805
																	0.713336		11	2																		0.0958592	0.0540684	0.0948264	0.243467	0.117019	0.177514	0.0856018	0.0477211	0.109724	0.0923202	0.162359	0.917504
																	0.530319		5	6																		0.0980392	0.0481904	0.0969829	0.160059	0.119681	0.17743	0.0875485	0.0418037	0.11222	0.0582383	0.166051	0.899704
																	0.633257		11	11																		0.100219	0.0435815	0.0991394	0.106599	0.122342	0.175585	0.0894953	0.0371639	0.114715	0.0431608	0.169744	0.8805
																	0.730825		8	5																		0.102395	0.0397271	0.101292	0.0758235	0.124998	0.177544	0.0914384	0.0332836	0.117206	0.0379118	0.173429	0.863349
																	0.686378		11	2																		0.104575	0.037365	0.103448	0.0592715	0.127659	0.178621	0.0933851	0.0309057	0.119701	0.0360338	0.177121	0.855191
																	0.61888		6	2																		0.106755	0.0357543	0.105605	0.0498606	0.130321	0.174429	0.0953318	0.0292841	0.122196	0.0358854	0.180814	0.843631
																	0.562379		11	2																		0.108931	0.0336137	0.107757	0.0428324	0.132977	0.169832	0.097275	0.0271292	0.124687	0.0373166	0.184499	0.833767
																			6	9																		0.111111	0.0319167	0.109914	0.0393143	0.135638	0.164619	0.0992217	0.0254208	0.127182	0.0380453	0.188191	0.811847
																			3	4																		0.113291	0.0308286	0.11207	0.0369328	0.138299	0.154232	0.101168	0.0243254	0.129678	0.0369516	0.191884	0.818021
																			11	4																		0.115467	0.0294271	0.114223	0.0370827	0.140956	0.150954	0.103112	0.0229145	0.132168	0.0365447	0.195569	0.823523
																			11	9																		0.117647	0.0278879	0.116379	0.0355095	0.143617	0.146779	0.105058	0.0213649	0.134664	0.0369839	0.199262	0.832314
																			11	3																		0.119827	0.0263944	0.118536	0.0324355	0.146278	0.144954	0.107005	0.0198614	0.137159	0.0371054	0.202954	0.836774
																			11	9																		0.122003	0.0242376	0.120688	0.0310498	0.148934	0.139874	0.108948	0.0176902	0.13965	0.0373676	0.206639	0.833851
																			2	6																		0.124183	0.022023	0.122845	0.0299465	0.151595	0.138444	0.110895	0.0154608	0.142145	0.036173	0.210332	0.847716
																			11	11																		0.126363	0.0213649	0.125001	0.0284943	0.154257	0.145348	0.112842	0.0147982	0.14464	0.0355984	0.214024	0.859135
																			11	5																		0.128539	0.0194805	0.127154	0.0283001	0.156913	0.149648	0.114785	0.0129011	0.147131	0.0341153	0.217709	0.865127
																				2																		0.130719	0.0189035	0.129311	0.027886	0.159574	0.151153	0.116731	0.0123203	0.149626	0.0339366	0.221402	0.880423
																				3																		0.132899	0.018547	0.131467	0.0272578	0.162235	0.162995	0.118678	0.0119614	0.152121	0.0344387	0.225094	0.895137
																				5																		0.135075	0.0187517	0.13362	0.0261099	0.164892	0.169337	0.120621	0.0121675	0.154612	0.0340964	0.228779	0.90917
																				8																		0.137255	0.0162809	0.135776	0.0260232	0.167553	0.170498	0.122568	0.00968011	0.157107	0.0337932	0.232472	0.911399
																				6																		0.139435	0.0151889	0.137933	0.0259084	0.170214	0.169123	0.124515	0.00858074	0.159603	0.0340665	0.236164	0.92109
																				3																		0.141611	0.0158871	0.140085	0.0263804	0.17287	0.170439	0.126458	0.00928366	0.162093	0.0344132	0.23985	0.944669
																				10																		0.143791	0.0169201	0.142242	0.0263676	0.175532	0.165846	0.128405	0.0103235	0.164589	0.0351234	0.243542	0.956371
																				11																		0.145971	0.0171041	0.144398	0.0259797	0.178193	0.161661	0.130351	0.0105088	0.167084	0.0370717	0.247234	0.974387
																				6																		0.148147	0.0176729	0.146551	0.0256565	0.180849	0.166115	0.132294	0.0110814	0.169575	0.0381024	0.25092	0.982745
																				5																		0.150327	0.0176215	0.148707	0.0255004	0.18351	0.171007	0.134241	0.0110297	0.17207	0.038095	0.254612	0.990462
																				11																		0.152507	0.0181454	0.150864	0.0241288	0.186172	0.164199	0.136188	0.0115571	0.174565	0.0377048	0.258304	0.990162
																				6																		0.154683	0.0176346	0.153016	0.023158	0.188828	0.151321	0.138131	0.0110429	0.177056	0.0385965	0.26199	0.98394
																				11																		0.156863	0.0187603	0.155173	0.0225838	0.191489	0.152806	0.140078	0.0121762	0.179551	0.0392395	0.265682	1
																				1																		0.159043	0.019436	0.157329	0.0225126	0.19415	0.155711	0.142024	0.0128563	0.182047	0.0386742	0.269374	0.999491
																				4																		0.161219	0.019502	0.159482	0.0223502	0.196807	0.161763	0.143968	0.0129228	0.184537	0.0387331	0.27306	0.981753
																				1																		0.163399	0.0191322	0.161638	0.0217203	0.199468	0.172094	0.145914	0.0125505	0.187033	0.0396492	0.276752	0.964528
																				1																		0.165579	0.0190462	0.163795	0.0224897	0.202129	0.180888	0.147861	0.0124639	0.189528	0.0387296	0.280444	0.945021
																				1																		0.167755	0.0193513	0.165947	0.0223245	0.204785	0.185372	0.149804	0.0127711	0.192019	0.0378917	0.28413	0.948213
																				7																		0.169935	0.0192305	0.168104	0.0216137	0.207446	0.191729	0.151751	0.0126494	0.194514	0.0380263	0.287822	0.956868
																				10																		0.172115	0.0178977	0.17026	0.0226249	0.210108	0.203785	0.153698	0.0113078	0.197009	0.0391172	0.291515	0.942745
																				11																		0.174291	0.0165887	0.172413	0.0239816	0.212764	0.219992	0.155641	0.00998993	0.1995	0.0402129	0.2952	0.926812
																				3																		0.176471	0.0164376	0.174569	0.0248287	0.215425	0.235152	0.157587	0.00983786	0.201995	0.0406679	0.298892	0.90997
																				5																		0.178651	0.0148919	0.176726	0.0252944	0.218086	0.247404	0.159534	0.00828174	0.204491	0.0417472	0.302585	0.925411
																				3																		0.180827	0.0145128	0.178878	0.0247777	0.220743	0.252212	0.161477	0.00790012	0.206981	0.041695	0.30627	0.944498
																				1																		0.183007	0.014041	0.181035	0.0255554	0.223404	0.25444	0.163424	0.00742513	0.209477	0.0425882	0.309962	0.954028
																																						0.185187	0.014288	0.183191	0.0255454	0.226065	0.257384	0.165371	0.00767383	0.211972	0.0438875	0.313655	0.955121
																																						0.187362	0.013757	0.185344	0.0260686	0.228721	0.262283	0.167314	0.00713923	0.214463	0.0451234	0.31734	0.950995
																																						0.189542	0.01335	0.1875	0.027061	0.231383	0.254069	0.16926	0.00672947	0.216958	0.0457802	0.321032	0.935873
																																						0.191722	0.0143005	0.189657	0.0270065	0.234044	0.24415	0.171207	0.00768643	0.219453	0.0466985	0.324725	0.925284
																																						0.193898	0.0152928	0.191809	0.02629	0.2367	0.229137	0.17315	0.0086853	0.221944	0.04397	0.32841	0.946184
																																						0.196078	0.0154551	0.193966	0.0255601	0.239361	0.213273	0.175097	0.0088487	0.224439	0.0444136	0.332103	0.963123
																																						0.198258	0.0168118	0.196122	0.0248222	0.242023	0.205161	0.177044	0.0102145	0.226935	0.0442633	0.335795	0.961896
																																						0.200434	0.0174309	0.198275	0.0251521	0.244679	0.193708	0.178987	0.0108378	0.229425	0.0453481	0.33948	0.952016
																																						0.202614	0.0186768	0.200431	0.0249011	0.24734	0.187997	0.180934	0.012092	0.231921	0.0454924	0.343173	0.953555
																																						0.204794	0.0186965	0.202588	0.0248684	0.250001	0.172358	0.18288	0.0121119	0.234416	0.0459601	0.346865	0.96295
																																						0.20697	0.0190391	0.20474	0.0240394	0.252658	0.159881	0.184823	0.0124568	0.236907	0.0463224	0.35055	0.967147
																																						0.20915	0.0187304	0.206897	0.0230721	0.255319	0.157176	0.18677	0.012146	0.239402	0.0460185	0.354243	0.954222
																																						0.21133	0.0184402	0.209053	0.0223341	0.25798	0.156759	0.188717	0.0118538	0.241897	0.0451506	0.357935	0.957418
																																						0.213506	0.0184685	0.211206	0.0228051	0.260636	0.16054	0.19066	0.0118824	0.244388	0.0481333	0.361621	0.929939
																																						0.215686	0.0189527	0.213362	0.0232961	0.263297	0.153711	0.192607	0.0123698	0.246883	0.0475025	0.365313	0.9026
																																						0.217866	0.0190443	0.215519	0.0234723	0.265959	0.148198	0.194553	0.012462	0.249378	0.0469052	0.369005	0.86379
																																						0.220042	0.0190379	0.217671	0.0237397	0.268615	0.145211	0.196497	0.0124556	0.251869	0.045046	0.372691	0.835995
																																						0.222222	0.0183125	0.219828	0.0236694	0.271276	0.143192	0.198443	0.0117254	0.254364	0.0448371	0.376383	0.809875
																																						0.224402	0.0184779	0.221984	0.0235235	0.273937	0.143416	0.20039	0.0118918	0.25686	0.0444615	0.380075	0.777475
																																						0.226578	0.0185139	0.224137	0.0245972	0.276594	0.139773	0.202333	0.0119281	0.25935	0.0445575	0.383761	0.732708
																																						0.228758	0.0201043	0.226293	0.0252028	0.279255	0.13641	0.20428	0.0135292	0.261846	0.0451277	0.387453	0.721136
																																						0.230938	0.0203207	0.22845	0.0262919	0.281916	0.130857	0.206227	0.013747	0.264341	0.0452754	0.391145	0.726098
																																						0.233114	0.0211659	0.230602	0.0259112	0.284572	0.126622	0.20817	0.0145978	0.266832	0.0454013	0.394831	0.728959
																																						0.235294	0.021449	0.232759	0.0248709	0.287234	0.138508	0.210116	0.0148828	0.269327	0.0460827	0.398523	0.73088
																																						0.237474	0.0210983	0.234915	0.0249057	0.289895	0.138612	0.212063	0.0145298	0.271822	0.0470008	0.402215	0.747039
																																						0.23965	0.0206224	0.237068	0.025005	0.292551	0.143472	0.214006	0.0140507	0.274313	0.0472537	0.405901	0.766834
																																						0.24183	0.020662	0.239224	0.0252083	0.295212	0.143227	0.215953	0.0140905	0.276808	0.04756	0.409593	0.785609
																																						0.24401	0.020402	0.241381	0.0252476	0.297873	0.146232	0.2179	0.0138289	0.279304	0.0473248	0.413285	0.795219
																																						0.246186	0.0213569	0.243533	0.0247667	0.30053	0.14728	0.219843	0.0147902	0.281794	0.0457386	0.416971	0.814705
																																						0.248366	0.0205566	0.24569	0.0244967	0.303191	0.153016	0.22179	0.0139844	0.28429	0.0460355	0.420663	0.825228
																																						0.250546	0.0209391	0.247846	0.0244445	0.305852	0.157367	0.223736	0.0143696	0.286785	0.0461889	0.424356	0.8075
																																						0.252722	0.0225268	0.249999	0.0247334	0.308508	0.160349	0.225679	0.0159679	0.289276	0.0456155	0.428041	0.795807
																																						0.254902	0.0235895	0.252156	0.025641	0.31117	0.156091	0.227626	0.0170378	0.291771	0.0456455	0.431733	0.781858
																																						0.257082	0.0247974	0.254312	0.0272395	0.313831	0.159715	0.229573	0.0182537	0.294266	0.0458058	0.435426	0.762291
																																						0.259258	0.0247717	0.256465	0.0280542	0.316487	0.161152	0.231516	0.0182279	0.296757	0.0468689	0.439111	0.743709
																																						0.261438	0.0263048	0.258621	0.0289752	0.319148	0.161918	0.233463	0.0197712	0.299252	0.0471951	0.442803	0.719249
																																						0.263618	0.0277888	0.260778	0.0295647	0.32181	0.165867	0.235409	0.0212652	0.301748	0.047498	0.446496	0.714318
																																						0.265794	0.0274007	0.26293	0.0302257	0.324466	0.166888	0.237353	0.0208745	0.304238	0.0491449	0.450181	0.715279
																																						0.267974	0.0281887	0.265087	0.0307763	0.327127	0.160951	0.239299	0.0216678	0.306734	0.0491399	0.453874	0.712152
																																						0.270154	0.0301043	0.267243	0.0309553	0.329788	0.159953	0.241246	0.0235963	0.309229	0.0494628	0.457566	0.702216
																																						0.27233	0.0296315	0.269396	0.0314267	0.332445	0.161103	0.243189	0.0231203	0.31172	0.0503841	0.461251	0.721148
																																						0.27451	0.0293063	0.271552	0.0318798	0.335106	0.157784	0.245136	0.0227929	0.314215	0.0506228	0.464944	0.726387
																																						0.27669	0.0284788	0.273709	0.0314919	0.337767	0.153834	0.247083	0.0219599	0.31671	0.0504748	0.468636	0.721476
																																						0.278866	0.0289783	0.275861	0.0320034	0.340423	0.151559	0.249026	0.0224627	0.319201	0.050308	0.472321	0.715294
																																						0.281046	0.0286456	0.278018	0.0330329	0.343085	0.153523	0.250972	0.0221277	0.321696	0.0496915	0.476014	0.710527
																																						0.283226	0.0279662	0.280174	0.0329448	0.345746	0.154221	0.252919	0.0214438	0.324192	0.0484368	0.479706	0.700687
																																						0.285402	0.0278717	0.282327	0.0330021	0.348402	0.156504	0.254862	0.0213487	0.326682	0.0479623	0.483391	0.691501
																																						0.287582	0.0270153	0.284483	0.0338011	0.351063	0.161357	0.256809	0.0204865	0.329178	0.0486998	0.487084	0.677729
																																						0.289762	0.0253507	0.28664	0.0347409	0.353724	0.163036	0.258756	0.0188108	0.331673	0.0494872	0.490776	0.688451
																																						0.291938	0.0258696	0.288792	0.035122	0.356381	0.164656	0.260699	0.0193331	0.334164	0.0485397	0.494462	0.673581
																																						0.294118	0.026462	0.290949	0.0357882	0.359042	0.165557	0.262646	0.0199295	0.336659	0.0483544	0.498154	0.661161
																																						0.296298	0.0265369	0.293105	0.0366479	0.361703	0.16552	0.264592	0.0200049	0.339154	0.0476685	0.501846	0.666474
																																						0.298474	0.0274217	0.295258	0.0366048	0.364359	0.167545	0.266535	0.0208957	0.341645	0.0479337	0.505532	0.659415
																																						0.300654	0.0275063	0.297414	0.0358109	0.367021	0.168382	0.268482	0.0209808	0.34414	0.0482909	0.509224	0.661844
																																						0.302834	0.0276987	0.299571	0.0367237	0.369682	0.166603	0.270429	0.0211745	0.346635	0.0490187	0.512916	0.67033
																																						0.30501	0.0287717	0.301723	0.0376852	0.372338	0.166667	0.272372	0.0222547	0.349126	0.0493987	0.516602	0.671359
																																						0.30719	0.0293827	0.30388	0.0373147	0.374999	0.166768	0.274319	0.0228698	0.351621	0.0485042	0.520294	0.686401
																																						0.30937	0.0306596	0.306036	0.038131	0.377661	0.16402	0.276265	0.0241553	0.354117	0.0479664	0.523986	0.690805
																																						0.311545	0.0302719	0.308189	0.0399858	0.380317	0.159799	0.278209	0.0237649	0.356607	0.0481482	0.527672	0.688498
																																						0.313725	0.0300829	0.310345	0.0395714	0.382978	0.156876	0.280155	0.0235747	0.359103	0.0479559	0.531364	0.692082
																																						0.315905	0.0302653	0.312502	0.0398682	0.385639	0.157191	0.282102	0.0237583	0.361598	0.04892	0.535056	0.694358
																																						0.318081	0.0294121	0.314654	0.039882	0.388296	0.151759	0.284045	0.0228994	0.364089	0.0487823	0.538742	0.703078
																																						0.320261	0.0292487	0.316811	0.0396052	0.390957	0.144249	0.285992	0.0227349	0.366584	0.0488525	0.542434	0.714726
																																						0.322441	0.0289786	0.318967	0.0396707	0.393618	0.142226	0.287939	0.022463	0.369079	0.0498071	0.546126	0.722633
																																						0.324617	0.0282919	0.32112	0.0419892	0.396274	0.137791	0.289882	0.0217716	0.37157	0.0506654	0.549812	0.729453
																																						0.326797	0.0286092	0.323276	0.0435349	0.398936	0.138568	0.291828	0.0220911	0.374065	0.0511339	0.553504	0.727277
																																						0.328977	0.0282776	0.325433	0.0431617	0.401597	0.139713	0.293775	0.0217572	0.376561	0.0512214	0.557197	0.726033
																																						0.331153	0.0280774	0.327585	0.0420536	0.404253	0.14152	0.295718	0.0215557	0.379051	0.0519638	0.560882	0.72463
																																						0.333333	0.0284023	0.329742	0.0426215	0.406914	0.144206	0.297665	0.0218828	0.381547	0.0519009	0.564574	0.749642
																																						0.335513	0.0297659	0.331898	0.0418348	0.409575	0.143424	0.299612	0.0232556	0.384042	0.0532409	0.568267	0.764629
																																						0.337689	0.0308847	0.334051	0.0417087	0.412232	0.148001	0.301555	0.0243819	0.386533	0.0537734	0.571952	0.773853
																																						0.339869	0.0309429	0.336207	0.0427391	0.414893	0.153961	0.303502	0.0244405	0.389028	0.0531889	0.575644	0.774302
																																						0.342049	0.0311957	0.338364	0.042724	0.417554	0.150887	0.305448	0.0246949	0.391523	0.053436	0.579337	0.77281
																																						0.344225	0.0299917	0.340516	0.0400682	0.42021	0.152933	0.307391	0.0234829	0.394014	0.0541979	0.583022	0.766709
																																						0.346405	0.0299597	0.342673	0.0399267	0.422872	0.151678	0.309338	0.0234507	0.396509	0.0549477	0.586715	0.76949
																																						0.348585	0.0290092	0.344829	0.0403966	0.425533	0.146998	0.311285	0.0224938	0.399005	0.0552848	0.590407	0.785098
																																						0.350761	0.0297107	0.346982	0.0402105	0.428189	0.147374	0.313228	0.0232	0.401495	0.0562153	0.594092	0.798015
																																						0.352941	0.0298608	0.349138	0.0400181	0.43085	0.149131	0.315175	0.0233511	0.403991	0.0565899	0.597785	0.797368
																																						0.355121	0.0298416	0.351295	0.039979	0.433512	0.147825	0.317121	0.0233318	0.406486	0.056305	0.601477	0.76644
																																						0.357297	0.0286849	0.353447	0.0407727	0.436168	0.148127	0.319065	0.0221673	0.408977	0.0572221	0.605162	0.771621
																																						0.359477	0.0284224	0.355604	0.0398268	0.438829	0.145886	0.321011	0.021903	0.411472	0.0592539	0.608855	0.791994
																																						0.361657	0.0290311	0.35776	0.0410357	0.44149	0.147159	0.322958	0.0225159	0.413967	0.0601771	0.612547	0.807424
																																						0.363833	0.0306126	0.359913	0.0417365	0.444147	0.144589	0.324901	0.0241079	0.416458	0.060444	0.616232	0.829194
																																						0.366013	0.0307509	0.362069	0.0423423	0.446808	0.142726	0.326848	0.0242472	0.418953	0.0613663	0.619925	0.845042
																																						0.368193	0.0313894	0.364226	0.043254	0.449469	0.146253	0.328795	0.02489	0.421449	0.0617232	0.623617	0.84656
																																						0.370369	0.0308048	0.366378	0.0440861	0.452125	0.144344	0.330738	0.0243014	0.423939	0.0597845	0.627303	0.852314
																																						0.372549	0.029882	0.368535	0.0454568	0.454786	0.140934	0.332684	0.0233725	0.426435	0.0618142	0.630995	0.843172
																																						0.374729	0.0287943	0.370691	0.0464747	0.457448	0.144498	0.334631	0.0222775	0.42893	0.0620269	0.634687	0.874766
																																						0.376905	0.029775	0.372844	0.0468122	0.460104	0.147803	0.336574	0.0232648	0.431421	0.0626379	0.638373	0.881506
																																						0.379085	0.0311226	0.375	0.0477436	0.462765	0.147135	0.338521	0.0246214	0.433916	0.0628142	0.642065	0.880773
																																						0.381265	0.0310558	0.377157	0.046521	0.465426	0.149527	0.340468	0.0245541	0.436411	0.0631593	0.645757	0.883151
																																						0.383441	0.0307126	0.37931	0.0462755	0.468083	0.160309	0.342411	0.0242087	0.438902	0.0627963	0.649443	0.889097
																																						0.385621	0.0310852	0.381466	0.0447206	0.470744	0.161897	0.344358	0.0245838	0.441397	0.0619258	0.653135	0.890913
																																						0.387801	0.0307558	0.383623	0.0430539	0.473405	0.166657	0.346304	0.0242521	0.443892	0.0617155	0.656827	0.896871
																																						0.389977	0.0311724	0.385775	0.0421802	0.476061	0.177421	0.348247	0.0246715	0.446383	0.0642114	0.660513	0.882681
																																						0.392157	0.0315555	0.387932	0.0409275	0.478723	0.187295	0.350194	0.0250572	0.448878	0.0642863	0.664205	0.890634
																																						0.394337	0.0321343	0.390088	0.0402611	0.481384	0.192755	0.352141	0.0256398	0.451374	0.064268	0.667897	0.898106
																																						0.396513	0.0333046	0.392241	0.0395527	0.48404	0.193127	0.354084	0.0268181	0.453864	0.06385	0.671583	0.907316
																																						0.398693	0.0335852	0.394397	0.0394928	0.486701	0.202208	0.356031	0.0271004	0.45636	0.0629039	0.675275	0.905907
																																						0.400873	0.0338791	0.396554	0.0395428	0.489363	0.206182	0.357977	0.0273964	0.458855	0.0614861	0.678968	0.900699
																																						0.403049	0.0351405	0.398706	0.039218	0.492019	0.202714	0.359921	0.0286662	0.461346	0.0587958	0.682653	0.891899
																																						0.405229	0.0355581	0.400863	0.0389687	0.49468	0.205926	0.361867	0.0290867	0.463841	0.0601236	0.686345	0.897044
																																						0.407409	0.0361921	0.403019	0.0379318	0.497341	0.201923	0.363814	0.0297249	0.466336	0.0611559	0.690038	0.885457
																																						0.409585	0.0369492	0.405172	0.0381221	0.499998	0.20221	0.365757	0.0304871	0.468827	0.0606398	0.693723	0.903742
																																						0.411765	0.0371777	0.407328	0.0376858	0.502659	0.200917	0.367704	0.0307171	0.471322	0.0599899	0.697415	0.912832
																																						0.413945	0.0365001	0.409485	0.0377178	0.50532	0.19658	0.369651	0.030035	0.473818	0.0596916	0.701108	0.907025
																																						0.416121	0.0348094	0.411637	0.0363471	0.507976	0.199279	0.371594	0.0283329	0.476308	0.0592834	0.704793	0.895961
																																						0.418301	0.0341852	0.413794	0.0359424	0.510637	0.200849	0.37354	0.0277045	0.478804	0.0596109	0.708485	0.892691
																																						0.420481	0.0336152	0.41595	0.0362712	0.513299	0.200449	0.375487	0.0271307	0.481299	0.0596877	0.712178	0.898297
																																						0.422657	0.0318403	0.418103	0.0373196	0.515955	0.206432	0.37743	0.0253439	0.48379	0.0619606	0.715863	0.896906
																																						0.424837	0.0298092	0.420259	0.0378029	0.518616	0.209274	0.379377	0.0232991	0.486285	0.0610452	0.719556	0.887149
																																						0.427017	0.0293409	0.422416	0.0391273	0.521277	0.218401	0.381324	0.0228277	0.48878	0.0603092	0.723248	0.9003
																																						0.429193	0.0279673	0.424568	0.0391196	0.523934	0.218083	0.383267	0.0214449	0.491271	0.0594153	0.726933	0.916108
																																						0.431373	0.0266355	0.426725	0.0401742	0.526595	0.221424	0.385214	0.0201042	0.493766	0.0598751	0.730626	0.914646
																																						0.433553	0.0269355	0.428881	0.0407816	0.529256	0.225969	0.38716	0.0204062	0.496262	0.0585547	0.734318	0.909344
																																						0.435729	0.0276236	0.431034	0.0423774	0.531912	0.232559	0.389103	0.0210989	0.498752	0.0592072	0.738003	0.930608
																																						0.437908	0.0266891	0.43319	0.0430655	0.534574	0.237955	0.39105	0.0201581	0.501248	0.0596345	0.741696	0.928301
																																						0.440088	0.0257721	0.435347	0.0435089	0.537235	0.250103	0.392997	0.0192349	0.503743	0.0608021	0.745388	0.914288
																																						0.442264	0.0249689	0.437499	0.0433975	0.539891	0.256539	0.39494	0.0184264	0.506234	0.0613726	0.749074	0.911791
																																						0.444444	0.0264783	0.439656	0.0439712	0.542552	0.265098	0.396887	0.0199459	0.508729	0.0613526	0.752766	0.906288
																																						0.446624	0.0275012	0.441812	0.0445672	0.545214	0.270351	0.398833	0.0209756	0.511224	0.0614393	0.756458	0.894404
																																						0.4488	0.0270722	0.443965	0.0452326	0.54787	0.27623	0.400777	0.0205438	0.513715	0.0613382	0.760144	0.880672
																																						0.45098	0.0276281	0.446121	0.0460825	0.550531	0.282271	0.402723	0.0211034	0.51621	0.0585003	0.763836	0.859962
																																						0.45316	0.0280576	0.448278	0.0464149	0.553192	0.296748	0.40467	0.0215358	0.518706	0.0595029	0.767528	0.868566
																																						0.455336	0.0267693	0.45043	0.0477485	0.555849	0.299513	0.406613	0.0202389	0.521196	0.0591333	0.771214	0.854228
																																						0.457516	0.0272649	0.452587	0.0485763	0.55851	0.297746	0.40856	0.0207378	0.523692	0.0586571	0.774906	0.866404
																																						0.459696	0.028313	0.454743	0.0484197	0.561171	0.298634	0.410507	0.0217929	0.526187	0.0576954	0.778598	0.876025
																																						0.461872	0.0296862	0.456896	0.0482164	0.563827	0.29866	0.41245	0.0231753	0.528678	0.0558346	0.782284	0.859145
																																						0.464052	0.028952	0.459052	0.0468733	0.566488	0.297312	0.414396	0.0224362	0.531173	0.055645	0.785976	0.847719
																																						0.466232	0.0275419	0.461209	0.0463854	0.56915	0.294383	0.416343	0.0210167	0.533668	0.0554289	0.789668	0.843168
																																						0.468408	0.027284	0.463361	0.0468051	0.571806	0.292614	0.418286	0.0207571	0.536159	0.055533	0.793354	0.815965
																																						0.470588	0.0273771	0.465518	0.0450349	0.574467	0.291464	0.420233	0.0208507	0.538654	0.0571598	0.797046	0.815295
																																						0.472768	0.0262754	0.467674	0.0443742	0.577128	0.286253	0.42218	0.0197417	0.541149	0.0577584	0.800738	0.803289
																																						0.474944	0.0259774	0.469827	0.0427326	0.579785	0.287029	0.424123	0.0194416	0.54364	0.0578846	0.804424	0.789484
																																						0.477124	0.0259048	0.471983	0.0411373	0.582446	0.293696	0.42607	0.0193685	0.546136	0.0574942	0.808116	0.762341
																																						0.479304	0.0250747	0.47414	0.0404982	0.585107	0.300815	0.428016	0.0185329	0.548631	0.0568828	0.811809	0.739376
																																						0.48148	0.0238428	0.476292	0.0401452	0.587763	0.307424	0.429959	0.0172927	0.551122	0.0587429	0.815494	0.717581
																																						0.48366	0.0243087	0.478449	0.0414395	0.590425	0.314222	0.431906	0.0177617	0.553617	0.0590034	0.819186	0.710969
																																						0.48584	0.0235947	0.480605	0.0419743	0.593086	0.322508	0.433853	0.0170429	0.556112	0.0593128	0.822879	0.693054
																																						0.488016	0.0244333	0.482758	0.0411027	0.595742	0.329534	0.435796	0.0178872	0.558603	0.0593664	0.826564	0.688553
																																						0.490196	0.0240692	0.484914	0.0426011	0.598403	0.330593	0.437743	0.0175207	0.561098	0.0580828	0.830256	0.673324
																																						0.492376	0.024445	0.487071	0.0435769	0.601064	0.32932	0.439689	0.017899	0.563593	0.0582892	0.833949	0.650917
																																						0.494552	0.0248489	0.489223	0.0437398	0.603721	0.328563	0.441633	0.0183056	0.566084	0.058315	0.837634	0.627609
																																						0.496732	0.0231143	0.49138	0.0440982	0.606382	0.323158	0.443579	0.0165594	0.568579	0.0579269	0.841327	0.603036
																																						0.498912	0.021914	0.493536	0.0448664	0.609043	0.311942	0.445526	0.015351	0.571075	0.0581644	0.845019	0.577592
																																						0.501088	0.0224599	0.495689	0.0460998	0.611699	0.302236	0.447469	0.0159005	0.573565	0.0561314	0.848704	0.569797
																																						0.503268	0.0214681	0.497845	0.0463682	0.614361	0.295303	0.449416	0.0149021	0.576061	0.0546432	0.852397	0.535541
																																						0.505448	0.0222166	0.500002	0.0462471	0.617022	0.288099	0.451363	0.0156557	0.578556	0.0544712	0.856089	0.503608
																																						0.507624	0.0219023	0.502155	0.0467972	0.619678	0.276674	0.453306	0.0153392	0.581047	0.0553616	0.859774	0.469819
																																						0.509804	0.0219814	0.504311	0.0457719	0.622339	0.27346	0.455252	0.0154188	0.583542	0.0569192	0.863467	0.428966
																																						0.511984	0.0227169	0.506468	0.0448463	0.625001	0.27315	0.457199	0.0161593	0.586037	0.0566436	0.867159	0.39904
																																						0.51416	0.0236129	0.50862	0.0448032	0.627657	0.265364	0.459142	0.0170613	0.588528	0.0562841	0.870844	0.358991
																																						0.51634	0.0247126	0.510777	0.0452662	0.630318	0.257202	0.461089	0.0181684	0.591023	0.0555293	0.874537	0.328534
																																						0.51852	0.0258416	0.512933	0.0442507	0.632979	0.252866	0.463036	0.0193049	0.593519	0.0544888	0.878229	0.307332
																																						0.520696	0.0261101	0.515086	0.0423012	0.635636	0.247167	0.464979	0.0195752	0.596009	0.0547398	0.881915	0.287178
																																						0.522876	0.0261006	0.517242	0.0415003	0.638297	0.23856	0.466926	0.0195656	0.598505	0.0528989	0.885607	0.266792
																																						0.525056	0.0255419	0.519399	0.0412684	0.640958	0.230495	0.468872	0.0190032	0.601	0.0506775	0.889299	0.241236
																																						0.527232	0.0249608	0.521551	0.0402965	0.643614	0.225944	0.470815	0.0184182	0.603491	0.0487571	0.892985	0.21479
																																						0.529412	0.024632	0.523708	0.0422115	0.646276	0.21486	0.472762	0.0180872	0.605986	0.0469265	0.896677	0.210447
																																						0.531592	0.0232959	0.525864	0.0436669	0.648937	0.198397	0.474709	0.0167422	0.608481	0.0446609	0.900369	0.200297
																																						0.533768	0.0219706	0.528017	0.0440924	0.651593	0.191441	0.476652	0.015408	0.610972	0.043342	0.904055	0.195641
																																						0.535948	0.021662	0.530173	0.0441383	0.654254	0.192166	0.478599	0.0150973	0.613467	0.0434573	0.907747	0.178654
																																						0.538128	0.0209743	0.53233	0.0447601	0.656915	0.191098	0.480545	0.0144049	0.615963	0.0434794	0.911439	0.159465
																																						0.540304	0.0209017	0.534482	0.0462152	0.659572	0.185866	0.482488	0.0143319	0.618453	0.0427669	0.915125	0.145988
																																						0.542484	0.0209818	0.536639	0.0469975	0.662233	0.184202	0.484435	0.0144125	0.620949	0.0439296	0.918817	0.135988
																																						0.544664	0.0206374	0.538795	0.0462462	0.664894	0.18541	0.486382	0.0140658	0.623444	0.0435221	0.922509	0.115966
																																						0.54684	0.0197675	0.540948	0.0465414	0.66755	0.181381	0.488325	0.0131901	0.625935	0.0421399	0.926195	0.113398
																																						0.54902	0.0189058	0.543104	0.0440117	0.670212	0.183144	0.490272	0.0123226	0.62843	0.0409649	0.929887	0.103361
																																						0.5512	0.0187231	0.545261	0.0423853	0.672873	0.185241	0.492219	0.0121387	0.630925	0.0411248	0.933579	0.0907197
																																						0.553376	0.0185618	0.547413	0.0420279	0.675529	0.183357	0.494162	0.0119762	0.633416	0.040552	0.937265	0.0819228
																																						0.555556	0.0182001	0.54957	0.0415428	0.67819	0.182713	0.496108	0.0116122	0.635911	0.0398114	0.940957	0.0807089
																																						0.557736	0.0183736	0.551726	0.0419559	0.680852	0.18011	0.498055	0.0117868	0.638407	0.0391677	0.94465	0.0806496
																																						0.559912	0.0175549	0.553879	0.04197	0.683508	0.178296	0.499998	0.0109626	0.640897	0.0389247	0.948335	0.0770631
																																						0.562092	0.0166266	0.556035	0.0414131	0.686169	0.17732	0.501945	0.0100281	0.643393	0.0375654	0.952027	0.0776216
																																						0.564271	0.0164633	0.558192	0.0422499	0.68883	0.173213	0.503892	0.00986367	0.645888	0.0377965	0.95572	0.0957387
																																						0.566447	0.0166536	0.560344	0.042208	0.691487	0.17819	0.505835	0.0100553	0.648379	0.0384251	0.959405	0.0947713
																																						0.568627	0.0175396	0.562501	0.0428765	0.694148	0.181036	0.507781	0.0109472	0.650874	0.0393046	0.963097	0.08948
																																						0.570807	0.0175886	0.564657	0.042757	0.696809	0.180972	0.509728	0.0109966	0.653369	0.0380215	0.96679	0.0819912
																																						0.572983	0.0175788	0.56681	0.041811	0.699465	0.181789	0.511671	0.0109867	0.65586	0.0369604	0.970475	0.0860443
																																						0.575163	0.0177217	0.568966	0.0412424	0.702127	0.171962	0.513618	0.0111306	0.658355	0.0362174	0.974168	0.0883321
																																						0.577343	0.0171319	0.571123	0.0400823	0.704788	0.165253	0.515565	0.0105368	0.66085	0.035882	0.97786	0.0892637
																																						0.579519	0.0177467	0.573275	0.0390941	0.707444	0.162907	0.517508	0.0111558	0.663341	0.0353731	0.981545	0.0901957
																																						0.581699	0.0184898	0.575432	0.0385912	0.710105	0.156713	0.519455	0.0119038	0.665836	0.0359767	0.985238	0.0838644
																																						0.583879	0.0190186	0.577588	0.0371374	0.712766	0.157198	0.521401	0.0124362	0.668332	0.0359246	0.98893	0.0716752
																																						0.586055	0.019416	0.579741	0.0362999	0.715423	0.152722	0.523344	0.0128363	0.670822	0.035101	0.992615	0.0727366
																																						0.588235	0.019793	0.581897	0.0364649	0.718084	0.149244	0.525291	0.0132158	0.673318	0.0348876	0.996308	0.0818569
																																						0.590415	0.0197392	0.584054	0.0362376	0.720745	0.147613	0.527238	0.0131616	0.675813	0.0348351	1	0.127611
																																						0.592591	0.0199314	0.586206	0.0364108	0.723401	0.146655	0.529181	0.013355	0.678304	0.0346511
																																						0.594771	0.0202833	0.588363	0.0362571	0.726063	0.14981	0.531128	0.0137094	0.680799	0.0342069
																																						0.596951	0.0204403	0.590519	0.0364031	0.728724	0.156113	0.533074	0.0138674	0.683294	0.0336504
																																						0.599127	0.0206229	0.592672	0.036437	0.73138	0.157429	0.535018	0.0140512	0.685785	0.0345713
																																						0.601307	0.0207714	0.594828	0.0364135	0.734041	0.157077	0.536964	0.0142007	0.68828	0.0344931
																																						0.603487	0.0202329	0.596985	0.0371408	0.736703	0.158014	0.538911	0.0136586	0.690776	0.0335507
																																						0.605663	0.0205598	0.599137	0.0364912	0.739359	0.15362	0.540854	0.0139876	0.693266	0.0330148
																																						0.607843	0.0203631	0.601294	0.0357067	0.74202	0.156182	0.542801	0.0137897	0.695762	0.0317657
																																						0.610023	0.0207624	0.60345	0.0355203	0.744681	0.16307	0.544748	0.0141916	0.698257	0.0314073
																																						0.612199	0.0213111	0.605603	0.034941	0.747338	0.163081	0.546691	0.014744	0.700748	0.0313163
																																						0.614379	0.0220085	0.607759	0.0343464	0.749999	0.162561	0.548637	0.0154461	0.703243	0.0314187
																																						0.616559	0.0221409	0.609916	0.0344146	0.75266	0.161914	0.550584	0.0155794	0.705738	0.0301083
																																						0.618735	0.0213153	0.612068	0.0344664	0.755316	0.165513	0.552527	0.0147483	0.708229	0.0282571
																																						0.620915	0.0210324	0.614225	0.0340086	0.757977	0.171624	0.554474	0.0144635	0.710724	0.0276989
																																						0.623095	0.0218511	0.616381	0.0333265	0.760639	0.174886	0.556421	0.0152877	0.71322	0.0282763
																																						0.625271	0.0227299	0.618534	0.0343866	0.763295	0.183184	0.558364	0.0161724	0.71571	0.0285107
																																						0.627451	0.0230074	0.62069	0.0336738	0.765956	0.179312	0.560311	0.0164518	0.718206	0.0286204
																																						0.629631	0.0239714	0.622847	0.0329302	0.768617	0.182818	0.562257	0.0174222	0.720701	0.0291988
																																						0.631807	0.0242225	0.625	0.0333271	0.771274	0.181118	0.5642	0.0176749	0.723192	0.0281469
																																						0.633987	0.0239136	0.627156	0.0342513	0.773935	0.18384	0.566147	0.017364	0.725687	0.0267697
																																						0.636167	0.0248299	0.629313	0.034382	0.776596	0.181488	0.568094	0.0182864	0.728182	0.0274186
																																						0.638343	0.0252374	0.631465	0.0342917	0.779252	0.179596	0.570037	0.0186967	0.730673	0.027439
																																						0.640523	0.025311	0.633622	0.0348593	0.781914	0.181683	0.571984	0.0187708	0.733168	0.0267772
																																						0.642703	0.0260539	0.635778	0.0348165	0.784575	0.175738	0.57393	0.0195186	0.735664	0.0259692
																																						0.644879	0.0260234	0.637931	0.0345041	0.787231	0.173689	0.575874	0.0194879	0.738154	0.0255607
																																						0.647059	0.0256167	0.640087	0.0352113	0.789892	0.177752	0.57782	0.0190785	0.74065	0.0255444
																																						0.649239	0.0246151	0.642244	0.0352045	0.792554	0.168285	0.579767	0.0180702	0.743145	0.0259234
																																						0.651415	0.0233845	0.644396	0.0352553	0.79521	0.170006	0.58171	0.0168314	0.745636	0.02721
																																						0.653595	0.0229876	0.646553	0.034736	0.797871	0.168692	0.583657	0.0164317	0.748131	0.0282054
																																						0.655775	0.0216697	0.648709	0.0339196	0.800532	0.168802	0.585604	0.0151051	0.750626	0.0288546
																																						0.657951	0.0211107	0.650862	0.0338736	0.803189	0.173325	0.587547	0.0145423	0.753117	0.0297471
																																						0.660131	0.0214372	0.653018	0.0334608	0.80585	0.171312	0.589493	0.0148709	0.755612	0.0302527
																																						0.662311	0.0200637	0.655175	0.0336596	0.808511	0.174309	0.59144	0.0134883	0.758107	0.0309007
																																						0.664487	0.0194214	0.657327	0.0335593	0.811167	0.177	0.593383	0.0128417	0.760598	0.031384
																																						0.666667	0.0193295	0.659484	0.033744	0.813828	0.17095	0.59533	0.0127492	0.763093	0.0310226
																																						0.668847	0.0194173	0.66164	0.0339882	0.81649	0.170852	0.597277	0.0128376	0.765589	0.030128
																																						0.671023	0.0201053	0.663793	0.0338815	0.819146	0.174485	0.59922	0.0135302	0.768079	0.0298831
																																						0.673203	0.0193141	0.665949	0.0335582	0.821807	0.177514	0.601167	0.0127337	0.770575	0.029549
																																						0.675383	0.0200205	0.668106	0.0338773	0.824468	0.181799	0.603113	0.0134448	0.77307	0.0290221
																																						0.677559	0.0215	0.670258	0.0331611	0.827125	0.179923	0.605056	0.0149342	0.775561	0.0284521
																																						0.679739	0.021662	0.672415	0.0330518	0.829786	0.181259	0.607003	0.0150973	0.778056	0.0276465
																																						0.681919	0.022786	0.674571	0.0331761	0.832447	0.182108	0.60895	0.0162288	0.780551	0.0255717
																																						0.684095	0.0227684	0.676724	0.0331848	0.835103	0.179212	0.610893	0.0162111	0.783042	0.0250936
																																						0.686275	0.0229952	0.67888	0.0324091	0.837765	0.181254	0.61284	0.0164395	0.785537	0.026248
																																						0.688454	0.0231567	0.681037	0.0323968	0.840426	0.185503	0.614786	0.016602	0.788033	0.0271106
																																						0.69063	0.0223804	0.683189	0.0322038	0.843082	0.184502	0.61673	0.0158205	0.790523	0.0271505
																																						0.69281	0.0232502	0.685346	0.0325176	0.845743	0.182652	0.618676	0.0166961	0.793019	0.029625
																																						0.69499	0.0237192	0.687502	0.0318513	0.848405	0.177577	0.620623	0.0171683	0.795514	0.0312535
																																						0.697166	0.022585	0.689655	0.0315511	0.851061	0.173338	0.622566	0.0160265	0.798005	0.0316431
																																						0.699346	0.0224362	0.691811	0.0315389	0.853722	0.170556	0.624513	0.0158767	0.8005	0.0341041
																																						0.701526	0.0224412	0.693968	0.031137	0.856383	0.170153	0.62646	0.0158817	0.802995	0.0370411
																																						0.703702	0.0222936	0.69612	0.0298558	0.85904	0.169833	0.628403	0.0157331	0.805486	0.0396244
																																						0.705882	0.0209126	0.698277	0.0297212	0.861701	0.171812	0.630349	0.0143429	0.807981	0.0415211
																																						0.708062	0.0212067	0.700433	0.0300291	0.864362	0.173395	0.632296	0.0146389	0.810477	0.0441047
																																						0.710238	0.0219745	0.702586	0.030658	0.867018	0.173065	0.634239	0.0154119	0.812967	0.0466409
																																						0.712418	0.0222211	0.704742	0.03019	0.869679	0.174073	0.636186	0.0156602	0.815463	0.0471183
																																						0.714598	0.0220209	0.706899	0.0310792	0.872341	0.177761	0.638133	0.0154586	0.817958	0.0477281
																																						0.716774	0.02237	0.709051	0.0317119	0.874997	0.18805	0.640076	0.01581	0.820449	0.0506435
																																						0.718954	0.0211798	0.711208	0.0320477	0.877658	0.199095	0.642023	0.0146118	0.822944	0.0533632
																																						0.721134	0.0191398	0.713364	0.031853	0.880319	0.210272	0.643969	0.0125581	0.825439	0.0581453
																																						0.72331	0.0185157	0.715517	0.0324048	0.882976	0.225566	0.645912	0.0119299	0.82793	0.0612827
																																						0.72549	0.0193252	0.717673	0.0330019	0.885637	0.245424	0.647859	0.0127448	0.830425	0.0640442
																																						0.72767	0.0188947	0.71983	0.0329971	0.888298	0.27113	0.649806	0.0123115	0.832921	0.0657803
																																						0.729846	0.0198525	0.721982	0.0326518	0.890954	0.303267	0.651749	0.0132757	0.835411	0.0671136
																																						0.732026	0.0192563	0.724139	0.0331933	0.893616	0.32864	0.653696	0.0126754	0.837907	0.0682698
																																						0.734206	0.0191864	0.726295	0.0336168	0.896277	0.357831	0.655642	0.012605	0.840402	0.0691866
																																						0.736382	0.0196438	0.728448	0.0338129	0.898933	0.388367	0.657586	0.0130655	0.842893	0.0678232
																																						0.738562	0.0208084	0.730604	0.0333526	0.901594	0.422335	0.659532	0.014238	0.845388	0.0651777
																																						0.740742	0.0221415	0.732761	0.0335245	0.904255	0.460124	0.661479	0.01558	0.847883	0.0612973
																																						0.742918	0.0225002	0.734913	0.0339677	0.906912	0.499455	0.663422	0.0159411	0.850374	0.0569928
																																						0.745098	0.0236695	0.73707	0.0331367	0.909573	0.535401	0.665369	0.0171182	0.852869	0.0533206
																																						0.747278	0.0226901	0.739226	0.0320287	0.912234	0.566546	0.667316	0.0161323	0.855364	0.0496281
																																						0.749454	0.0205052	0.741379	0.0317513	0.91489	0.606222	0.669259	0.0139327	0.857855	0.0474027
																																						0.751634	0.0198821	0.743535	0.0313258	0.917552	0.659014	0.671205	0.0133054	0.86035	0.0456891
																																						0.753814	0.0189404	0.745692	0.0301277	0.920213	0.705055	0.673152	0.0123574	0.862846	0.0441426
																																						0.75599	0.0191956	0.747844	0.0281151	0.922869	0.73476	0.675095	0.0126144	0.865336	0.0432442
																																						0.75817	0.0188576	0.750001	0.0269499	0.92553	0.747647	0.677042	0.012274	0.867832	0.0426092
																																						0.76035	0.0185463	0.752157	0.0263259	0.928192	0.740054	0.678989	0.0119606	0.870327	0.0422805
																																						0.762526	0.0181114	0.75431	0.0257155	0.930848	0.714119	0.680932	0.0115228	0.872818	0.0437155
																																						0.764706	0.016536	0.756467	0.0257754	0.933509	0.674375	0.682879	0.00993694	0.875313	0.0444312
																																						0.766886	0.0169988	0.758623	0.0249969	0.93617	0.626323	0.684825	0.0104028	0.877808	0.0447528
																																						0.769062	0.0178155	0.760776	0.0242052	0.938827	0.561495	0.686768	0.011225	0.880299	0.0438403
																																						0.771242	0.0187889	0.762932	0.0241835	0.941488	0.480433	0.688715	0.0122049	0.882794	0.0474088
																																						0.773422	0.0197682	0.765089	0.0239046	0.944149	0.396457	0.690662	0.0131908	0.88529	0.0520366
																																						0.775598	0.0192082	0.767241	0.0244145	0.946805	0.319344	0.692605	0.012627	0.88778	0.0613996
																																						0.777778	0.0187178	0.769398	0.0243395	0.949467	0.25389	0.694552	0.0121333	0.890276	0.0718728
																																						0.779958	0.0195209	0.771554	0.0239873	0.952128	0.20015	0.696498	0.0129418	0.892771	0.0947998
																																						0.782134	0.0192273	0.773707	0.023752	0.954784	0.161426	0.698442	0.0126462	0.895262	0.13138
																																						0.784314	0.0205015	0.775863	0.0238662	0.957445	0.131658	0.700388	0.013929	0.897757	0.184152
																																						0.786494	0.0204382	0.77802	0.0248557	0.960106	0.112259	0.702335	0.0138653	0.900252	0.25517
																																						0.78867	0.0207468	0.780172	0.0244483	0.962763	0.0980482	0.704278	0.014176	0.902743	0.342551
																																						0.79085	0.0197897	0.782329	0.0236982	0.965424	0.0910641	0.706225	0.0132124	0.905238	0.43652
																																						0.79303	0.0188866	0.784485	0.0232857	0.968085	0.0836451	0.708172	0.0123033	0.907734	0.53107
																																						0.795206	0.0178423	0.786638	0.0230919	0.970741	0.0802469	0.710115	0.0112519	0.910224	0.619465
																																						0.797386	0.017725	0.788794	0.0236671	0.973403	0.076984	0.712061	0.0111339	0.91272	0.701125
																																						0.799566	0.0156961	0.790951	0.0243894	0.976064	0.0730589	0.714008	0.0090914	0.915215	0.77652
																																						0.801742	0.0151506	0.793103	0.0247727	0.97872	0.0708193	0.715951	0.00854223	0.917706	0.846958
																																						0.803922	0.0131422	0.79526	0.0242603	0.981381	0.0721896	0.717898	0.00652035	0.920201	0.906395
																																						0.806102	0.0128149	0.797416	0.0240706	0.984043	0.0680615	0.719845	0.00619082	0.922696	0.952888
																																						0.808278	0.0124733	0.799569	0.0242032	0.986699	0.0620645	0.721788	0.0058469	0.925187	0.985429
																																						0.810458	0.0128638	0.801725	0.0245768	0.98936	0.0560087	0.723735	0.0062401	0.927682	0.996709
																																						0.812638	0.0130161	0.803882	0.0252512	0.992021	0.0573041	0.725681	0.00639338	0.930178	1
																																						0.814813	0.0132185	0.806034	0.0256139	0.994678	0.0548835	0.727624	0.00659712	0.932668	0.984721
																																						0.816993	0.0134278	0.808191	0.0262776	0.997339	0.0488336	0.729571	0.00680787	0.935164	0.954696
																																						0.819173	0.015192	0.810347	0.0267557	1	0.0591739	0.731518	0.00858389	0.937659	0.897125
																																						0.821349	0.0163852	0.8125	0.0268991			0.733461	0.00978513	0.94015	0.813061
																																						0.823529	0.0176958	0.814656	0.027315			0.735408	0.0111045	0.942645	0.71168
																																						0.825709	0.0186354	0.816813	0.0276564			0.737354	0.0120504	0.94514	0.598429
																																						0.827885	0.0187628	0.818965	0.0286508			0.739298	0.0121786	0.947631	0.482051
																																						0.830065	0.0200214	0.821122	0.0288547			0.741244	0.0134457	0.950126	0.372889
																																						0.832245	0.0208219	0.823278	0.0291332			0.743191	0.0142515	0.952621	0.270962
																																						0.834421	0.0215656	0.825431	0.0306065			0.745134	0.0150003	0.955112	0.188674
																																						0.836601	0.0223805	0.827587	0.0323511			0.747081	0.0158206	0.957607	0.126097
																																						0.838781	0.0224404	0.829744	0.0344887			0.749028	0.0158809	0.960103	0.0853926
																																						0.840957	0.0223284	0.831896	0.0366127			0.750971	0.0157682	0.962593	0.0617066
																																						0.843137	0.022125	0.834053	0.0383426			0.752917	0.0155634	0.965089	0.049647
																																						0.845317	0.0232478	0.836209	0.0409248			0.754864	0.0166937	0.967584	0.0456898
																																						0.847493	0.0243748	0.838362	0.0435247			0.756807	0.0178283	0.970075	0.0425564
																																						0.849673	0.0245686	0.840518	0.0458629			0.758754	0.0180234	0.97257	0.041409
																																						0.851853	0.0261934	0.842675	0.0471863			0.760701	0.0196591	0.975065	0.0408565
																																						0.854029	0.0275732	0.844827	0.0481395			0.762644	0.0210482	0.977556	0.0401343
																																						0.856209	0.0296311	0.846984	0.0483564			0.764591	0.0231199	0.980051	0.0413112
																																						0.858389	0.0315255	0.84914	0.0483732			0.766537	0.025027	0.982547	0.0409865
																																						0.860565	0.0334923	0.851293	0.0490204			0.76848	0.027007	0.985037	0.0403186
																																						0.862745	0.0404041	0.853449	0.0504066			0.770427	0.0339651	0.987533	0.0401334
																																						0.864925	0.0489984	0.855606	0.0509426			0.772374	0.0426171	0.990028	0.0392524
																																						0.867101	0.062761	0.857758	0.05166			0.774317	0.056472	0.992519	0.0389212
																																						0.869281	0.0835554	0.859915	0.0503191			0.776264	0.077406	0.995014	0.0407028
																																						0.871461	0.112421	0.862071	0.0507007			0.77821	0.106465	0.997509	0.0400935
																																						0.873637	0.152424	0.864224	0.0512478			0.780154	0.146737	1	0.0461048
																																						0.875817	0.203539	0.86638	0.0531279			0.7821	0.198195
																																						0.877997	0.279034	0.868537	0.0545605			0.784047	0.274197
																																						0.880173	0.377691	0.870689	0.0569423			0.78599	0.373516
																																						0.882353	0.499259	0.872846	0.0624223			0.787937	0.495899
																																						0.884533	0.636205	0.875002	0.0739078			0.789884	0.633764
																																						0.886709	0.766238	0.877155	0.0930973			0.791827	0.76467
																																						0.888889	0.864888	0.879312	0.132232			0.793773	0.863982
																																						0.891069	0.92033	0.881468	0.191235			0.79572	0.919795
																																						0.893245	0.928708	0.883621	0.264743			0.797663	0.92823
																																						0.895425	0.89973	0.885777	0.339472			0.79961	0.899057
																																						0.897605	0.837352	0.887934	0.403942			0.801557	0.83626
																																						0.899781	0.747264	0.890086	0.463269			0.8035	0.745568
																																						0.901961	0.627018	0.892243	0.531246			0.805447	0.624515
																																						0.904141	0.486291	0.894399	0.618018			0.807393	0.482844
																																						0.906317	0.346037	0.896552	0.724893			0.809336	0.341649
																																						0.908497	0.22944	0.898708	0.828193			0.811283	0.224269
																																						0.910677	0.14656	0.900865	0.918402			0.81323	0.140834
																																						0.912853	0.0999582	0.903017	0.982552			0.815173	0.0939188
																																						0.915033	0.0781106	0.905174	1			0.81712	0.0719247
																																						0.917213	0.0646912	0.90733	0.995626			0.819066	0.0584152
																																						0.919389	0.054871	0.909483	0.966875			0.821009	0.0485291
																																						0.921569	0.0477031	0.911639	0.909092			0.822956	0.0413131
																																						0.923749	0.0414138	0.913796	0.819282			0.824903	0.0349816
																																						0.925925	0.0367213	0.915948	0.698369			0.826846	0.0302577
																																						0.928105	0.032466	0.918105	0.56074			0.828793	0.0259738
																																						0.930285	0.0286225	0.920261	0.413198			0.83074	0.0221045
																																						0.932461	0.0242654	0.922414	0.276715			0.832683	0.0177181
																																						0.934641	0.0203825	0.92457	0.183903			0.834629	0.0138092
																																						0.936821	0.0172028	0.926727	0.122738			0.836576	0.0106082
																																						0.938996	0.0149354	0.928879	0.0887396			0.838519	0.00832558
																																						0.941176	0.0126658	0.931036	0.0711151			0.840466	0.00604068
																																						0.943356	0.0118449	0.933192	0.0606097			0.842413	0.0052143
																																						0.945532	0.0104092	0.935345	0.052601			0.844356	0.00376893
																																						0.947712	0.00949683	0.937501	0.0466562			0.846302	0.00285049
																																						0.949892	0.00825853	0.939658	0.042578			0.848249	0.00160388
																																						0.952068	0.00725547	0.94181	0.0380737			0.850192	0.000594089
																																						0.954248	0.00676391	0.943967	0.0326315			0.852139	9.92266e-05
																																						0.956428	0.00652807	0.946123	0.0285159			0.854086	-0.000138196
																																						0.958604	0.00709836	0.948276	0.0253398			0.856029	0.000435926
																																						0.960784	0.00758089	0.950432	0.0227331			0.857976	0.000921695
																																						0.962964	0.00723871	0.952589	0.0204162			0.859922	0.000577221
																																						0.96514	0.00712193	0.954741	0.0185096			0.861865	0.000459653
																																						0.96732	0.00620148	0.956898	0.0173392			0.863812	-0.00046697
																																						0.9695	0.00583397	0.959054	0.0161546			0.865759	-0.000836948
																																						0.971676	0.00572667	0.961207	0.0147104			0.867702	-0.000944964
																																						0.973856	0.005659	0.963363	0.0142459			0.869649	-0.0010131
																																						0.976036	0.00551557	0.96552	0.0136218			0.871595	-0.00115749
																																						0.978212	0.00487416	0.967672	0.0129108			0.873539	-0.0018032
																																						0.980392	0.00389936	0.969829	0.0121452			0.875485	-0.00278454
																																						0.982572	0.0029995	0.971985	0.0110992			0.877432	-0.00369044
																																						0.984748	0.00276125	0.974138	0.010112			0.879375	-0.00393029
																																						0.986928	0.00297396	0.976294	0.00868191			0.881322	-0.00371615
																																						0.989108	0.00300942	0.978451	0.00688375			0.883269	-0.00368045
																																						0.991284	0.00313501	0.980603	0.00573856			0.885212	-0.00355402
																																						0.993464	0.00271872	0.98276	0.0052164			0.887158	-0.0039731
																																						0.995644	0.00198584	0.984916	0.00453454			0.889105	-0.0047109
																																						0.99782	0.00112237	0.987069	0.00386942			0.891048	-0.00558016
																																						1	0	0.989225	0.00329113			0.892995	-0.00671007
																																								0.991382	0.00263795			0.894942	-0.0624965
																																								0.993534	0.00107286			0.896885	-0.0624965
																																								0.995691	0			0.898832	-0.0624965
																																								0.997847	0.000581412			0.900778	-0.0624965
																																								1	0.00251365			0.902721	-0.0624965
																																												0.904668	-0.0624965
																																												0.906615	-0.0624965
																																												0.908558	-0.0624965
																																												0.910505	-0.0624965
																																												0.912451	-0.0624965
																																												0.914395	-0.0624965
																																												0.916341	-0.0624965
																																												0.918288	-0.0624965
																																												0.920231	-0.0624965
																																												0.922178	-0.0624965
																																												0.924125	-0.0624965
																																												0.926068	-0.0624965
																																												0.928014	-0.0624965
																																												0.929961	-0.0624965
																																												0.931904	-0.0624965
																																												0.933851	-0.0624965
																																												0.935798	-0.0624965
																																												0.937741	-0.0624965
																																												0.939688	-0.0624965
																																												0.941634	-0.0624965
																																												0.943577	-0.0624965
																																												0.945524	-0.0624965
																																												0.947471	-0.0624965
																																												0.949414	-0.0624965
																																												0.951361	-0.0624965
																																												0.953307	-0.0624965
																																												0.955251	-0.0624965
																																												0.957197	-0.0624965
																																												0.959144	-0.0624965
																																												0.961087	-0.0624965
																																												0.963034	-0.0624965
																																												0.964981	-0.0624965
																																												0.966924	-0.0624965
																																												0.96887	-0.0624965
																																												0.970817	-0.0624965
																																												0.97276	-0.0624965
																																												0.974707	-0.0624965
																																												0.976654	-0.0624965
																																												0.978597	-0.0624965
																																												0.980544	-0.0624965
																																												0.98249	-0.0624965
																																												0.984433	-0.0624965
																																												0.98638	-0.0624965
																																												0.988327	-0.0624965
																																												0.99027	-0.0624965
																																												0.992217	-0.0624965
																																												0.994163	-0.0624965
																																												0.996107	-0.0624965
																																												0.998053	-0.0624965
																																												1	-0.0624965
[truncated: 12 more columns]
